# Supplementary material for: Hypothermia on admission to a neonatal intensive care unit in Oromia, western Ethiopia: a case–control study
Source: HighWire-hosted journal article supplement (doi:10.1136/bmjpo-2021-001168), 2021-10-01
Supplement: bmjpo-2021-001168supp002_data_supplement.pdf [file bmjpo-2021-001168supp002_data_supplement.pdf]

**Supplemental table 1: Neonatal related factors admitted to NICU of public hospitals of East Wollega Zone, western Ethiopia, February-April 2020**

| Variables                | Cases<br>n=73(%) | Controls<br>n=176(%) | Total<br>n=219(%) | Crude OR<br>(95% CI) | p-value |
|--------------------------|------------------|----------------------|-------------------|----------------------|---------|
| Sex of the new born      |                  |                      |                   |                      |         |
| Male                     | 38(52.1)         | 74(50.7)             | 112(51.1)         | 1.06(0.60,1.85)      | 0.85    |
| Female                   | 36(49.3)         | 72(49.3)             | 107(48.9)         | 1                    |         |
| Age of the new born      |                  |                      |                   |                      |         |
| < 1 day                  | 17(23.3)         | 22(15.1)             | 39(17.8)          | 1.75(0.80,3.80)      | 0.16*   |
| 1-3 day                  | 29(39.7)         | 63(43.2)             | 92(42)            | 1.04(0.55,1.96)      | 0.90    |
| > 3 day                  | 27(37)           | 61(41.8)             | 88(40.2)          | 1                    |         |
| Weight of newborn        |                  |                      |                   |                      |         |
| <2500 g                  | 30(41.1)         | 12(8.2)              | 42(19.2)          | 7.79(3.67,16.53)     | 0.01*   |
| ≥ 2500 g                 | 43(58.9)         | 134(91.8)            | 177(80.8)         | 1                    |         |
| Gestational age          |                  |                      |                   |                      |         |
| < 37 weeks               | 26(35.6)         | 18(12.3)             | 44(20.1)          | 3.93(1.98,7.83)      | 0.01*   |
| ≥ 37 weeks               | 47(64.4)         | 128(87.7)            | 175(79.9)         | 1                    |         |
| CPR done at birth        |                  |                      |                   |                      |         |
| Yes                      | 64(87.7)         | 70(47.9)             | 134(61.2)         | 7.72(3.58,16.67)     | 0.01*   |
| No                       | 9(12.3)          | 76(52.1)             | 85(38.8)          | 1                    |         |
| Neonatal medical problem |                  |                      |                   |                      |         |
| Yes                      | 35(47.9)         | 89(61.0)             | 124(56.6)         | 0.59(0.33,1.04)      | 0.07*   |
| No                       | 38(52.1)         | 57(39)               | 95(43.4)          | 1                    |         |
| Type of medical problems |                  |                      |                   |                      |         |
| Neonatal sepsis          | 6(17.1)          | 18(20.2)             | 24(19.4)          | 1                    |         |
| Birth asphyxia           | 18(51.4)         | 40(44.9)             | 58(46.8)          | 1.35(0.46,3.97)      | 0.59    |
| Respiratory disease      | 11(31.4)         | 31(34.8)             | 42(33.9)          | 1.07(0.34,3.37)      | 0.92    |

\*Variables that showed significant association during bivariable analysis
